# Supplementary material for: Ym1+ macrophages orchestrate fibrosis, lesion growth, and progression during development of murine pancreatic cancer
Source: PubMed Central journal article supplement — iScience. 2022 Apr 29;25(5):104327. doi: 10.1016/j.isci.2022.104327 (PMC9118688; doi:10.1016/j.isci.2022.104327), 2022-04-29
Supplement: mmc1.pdf [file mmc1.pdf]

iScience, Volume 25

## **Supplemental information**

### **Ym1<sup>+</sup> macrophages orchestrate fibrosis, lesion growth, and progression during development of murine pancreatic cancer**

**Alicia K. Fleming Martinez, Heike R. Döppler, Ligia I. Bastea, Brandy H. Edenfield, Geou-  
Yarh Liou, and Peter Storz**

Figure S1, Related to Figure 2

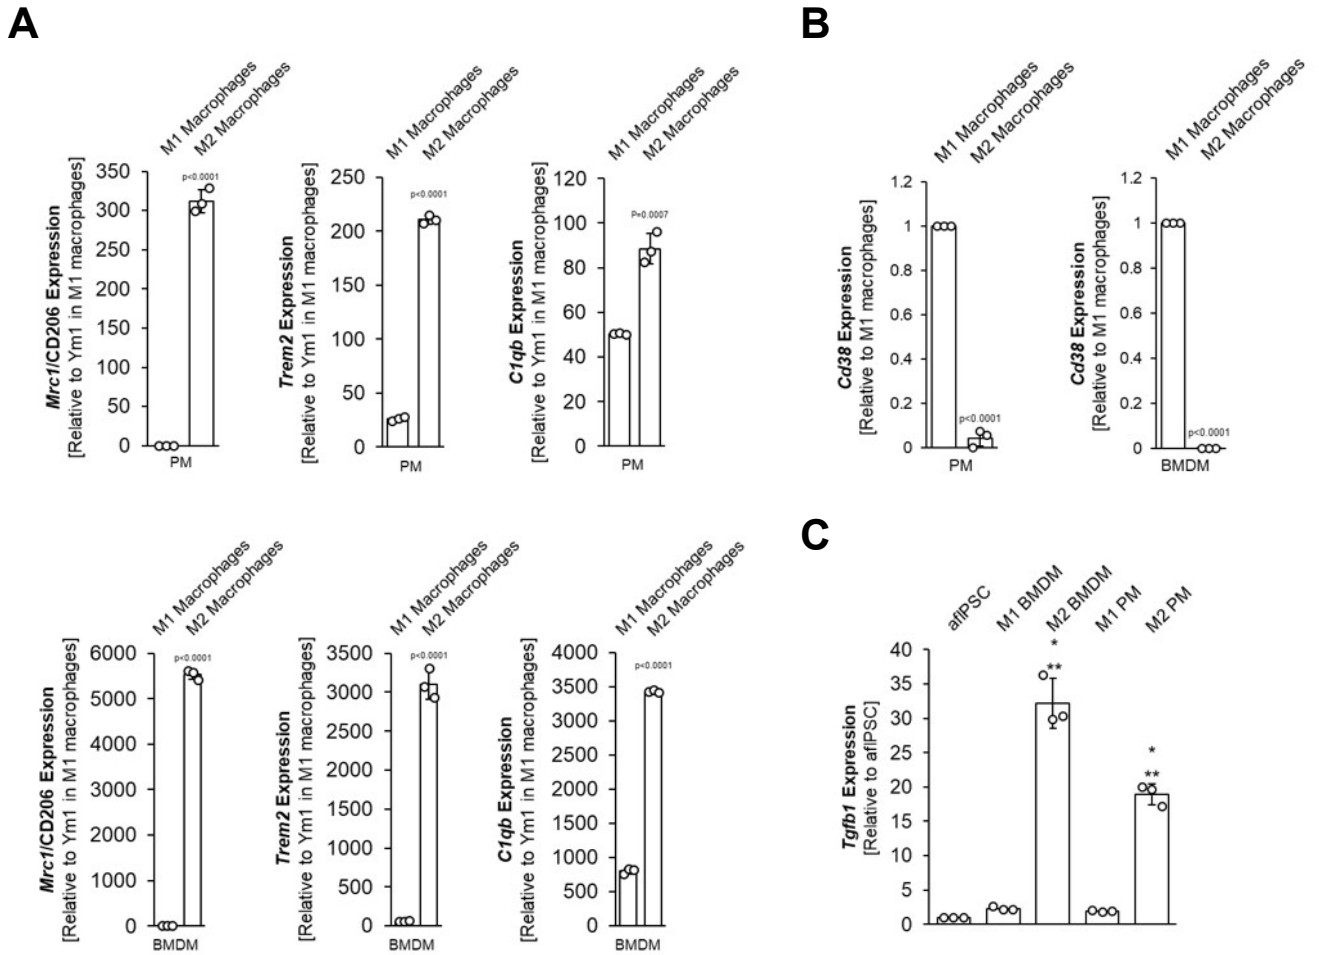

**Figure S1, Related to Figure 2. Ym1<sup>+</sup> macrophages express *Tgfb1* and additional AAM markers. A-B:** qPCR analysis in peritoneal (PM) or bone-marrow-derived (BMDM) macrophages. Error bars represent the standard deviation. The t-test was used for statistical significance of M2 macrophage markers (A) and M1 macrophage markers (B). **C:** qPCR analysis for *Tgfb1* in aIFPSC, BMDM, and PM. A one-way ANOVA was done for statistical analysis, followed by Tukey's multiple comparisons test. \*indicates statistical significance compared to aIFPSC and \*\*indicates statistical significance compared to M1 macrophages (adjusted *p*-value < 0.0001 for each comparison). Error bars represent the standard deviation.

Figure S2, Related to Figure 3

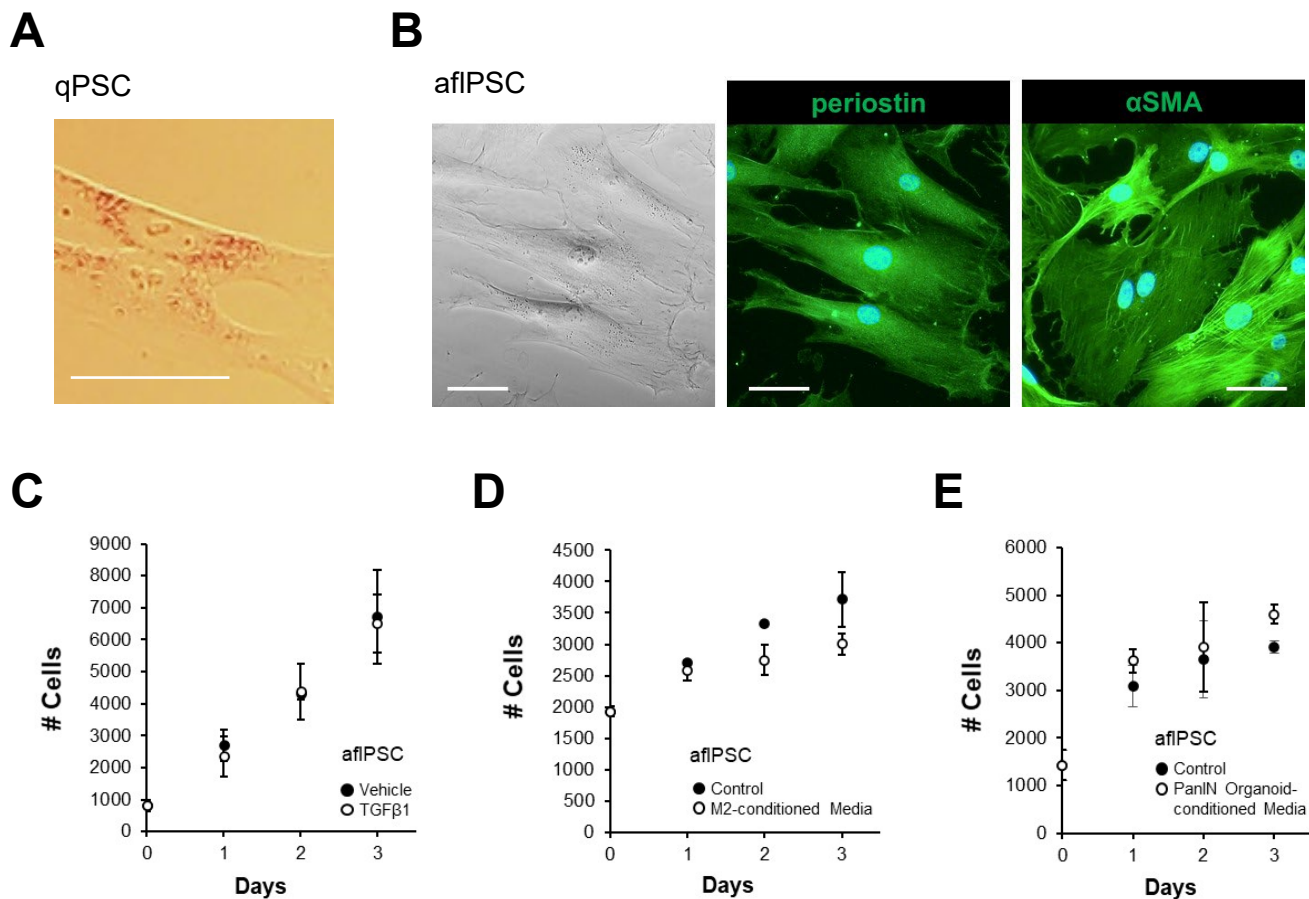

**Figure S2, Related to Figure 3. Proliferation of aflPSCs is not driven by AAMs or PanIN organoid cells.** **A:** Oil Red O staining in freshly isolated qPSCs. Scale bar indicates 50  $\mu$ m. **B:** Brightfield and IF images of aflPSC stained with periostin or  $\alpha$ SMA. Scale bar indicates 50  $\mu$ m. **C-E:** Proliferation of aflPSCs treated with TGF $\beta$ 1 (C), Peritoneal-derived M2-conditioned media (D), or PanIN organoid-conditioned media (E). Error bars indicate standard deviation.

Figure S3, Related to Figures 4 and 5

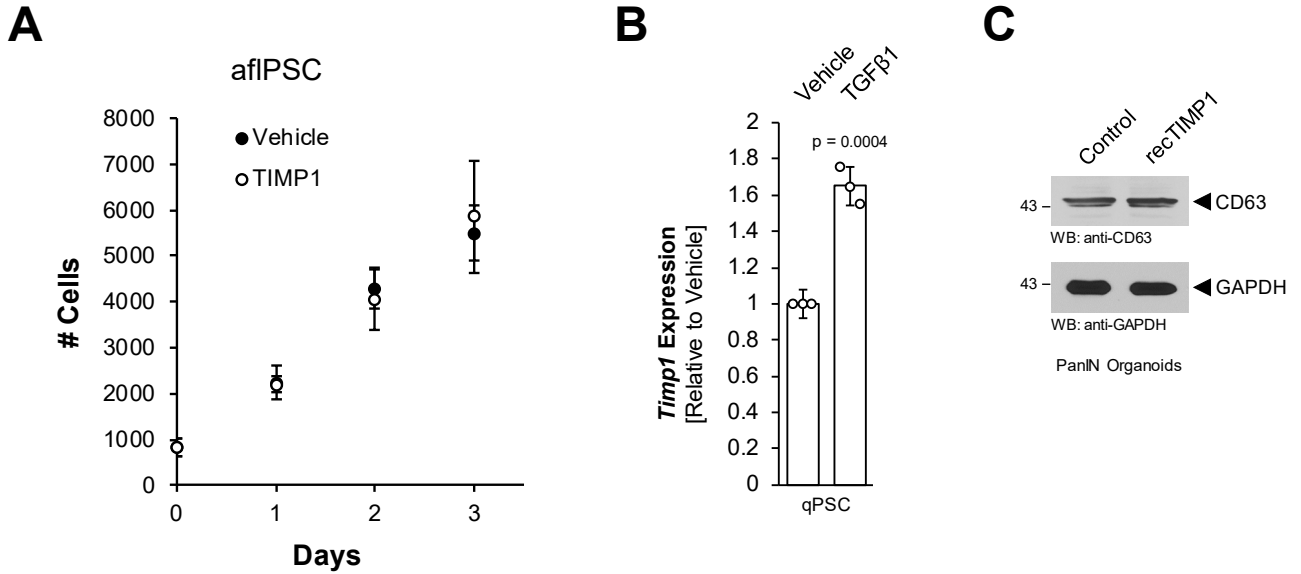

**Figure S3, Related to Figures 4 and 5. TIMP1 does not alter proliferation or  $\alpha$ SMA in afIPSCs.** **A:** Proliferation of afIPSCs treated with TIMP1 or vehicle control. Error bars indicate standard deviation. **B:** qPCR analysis of *Timp1* in qPSCs treated with TGF $\beta$ 1. Error bars indicate standard deviation. Statistical significance determined using the t-test. **C:** Western blot analysis of CD63 expression in PanIN organoids treated with vehicle control or recombinant TIMP1. GAPDH serves as a loading control.

Figure S4, Related to Figure 6

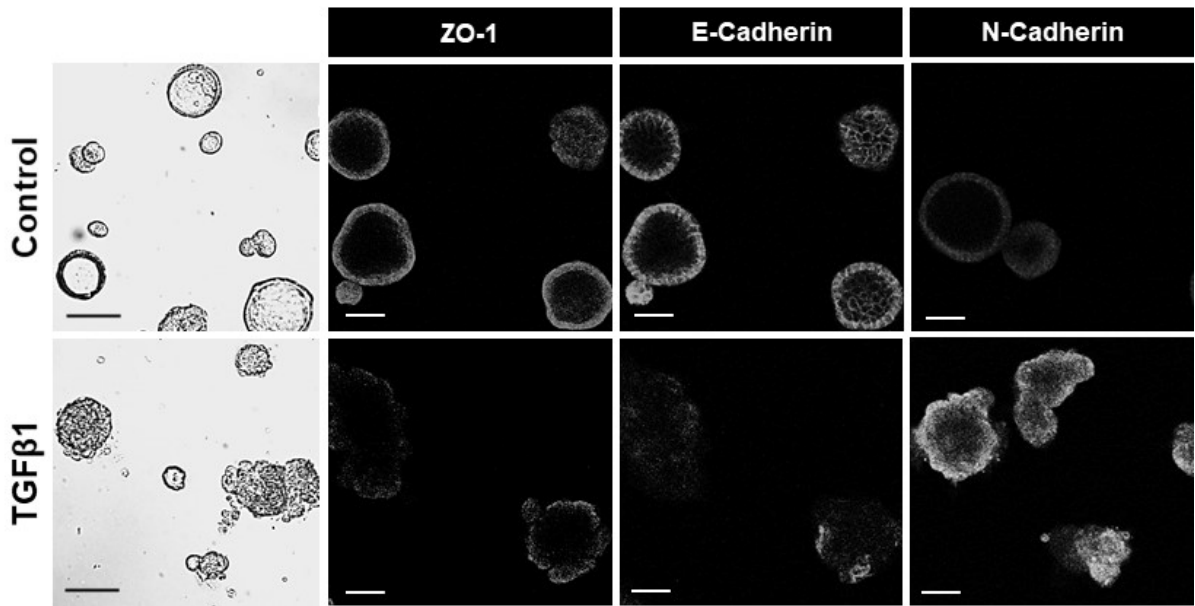

*Figure S4, Related to Figure 6. **TGFβ1 drives EMT-like structural changes in PanIN Cells.*** PanIN organoids were treated with vehicle control or TGFβ1 (50 ng/ml) for two days. Cells were fixated and analyzed for expression of ZO-1 & E-Cadherin or N-Cadherin via immunofluorescence. Scale bars indicate 100 μm (bright field) or 50 μm (IF).

Table S1

| Antibody    | Company/Source            | Catalog Number | Species | IHC   | IF-IHC | IF    | WB     | 3D Assay |
|-------------|---------------------------|----------------|---------|-------|--------|-------|--------|----------|
| CD63        | Sigma-Aldrich             | SAB5700799     | rabbit  |       |        |       | 1:1000 |          |
| CD63        | Abcam                     | ab134045       | rabbit  | 1:100 |        |       |        |          |
| CD63 (H5C6) | Novus                     | NBP2-42225     | mouse   |       |        |       |        | 1µg/mL   |
| E-Cadherin  | BD Biosciences            | 610181         | mouse   |       |        | 1:200 |        |          |
| GAPDH       | Cell Signaling Technology | 5174           | rabbit  |       |        |       | 1:2000 |          |
| IgG1 Mouse  | R&D Systems               | MAB002         | mouse   |       |        |       |        | 1µg/mL   |
| N-Cadherin  | Abcam                     | ab76011        | rabbit  |       |        | 1:200 |        |          |
| N-Cadherin  | R&D Systems               | AF6426         | sheep   |       | 1:200  |       |        |          |
| Periostin   | Abcam                     | ab14041        | rabbit  |       |        | 1:600 |        |          |
| SMAD4       | Cell Signaling Technology | 9515           | rabbit  | 1:30  | 1:30   |       |        |          |
| TIMP1       | R&D Systems               | AF980          | goat    | 1:750 | 1:1500 |       |        |          |
| Y369-TGFβ   | Boster Bio                | A00019Y369     | rabbit  | 1:200 | 1:200  |       |        |          |
| Ym1         | R&D Systems               | AF2446         | goat    |       | 1:500  |       |        |          |
| Ym1         | STEMCELL Technologies     | 60130          | rabbit  | 1:200 |        |       |        |          |
| ZO-1        | Invitrogen                | 33-9100        | mouse   |       |        | 1:200 |        |          |
| αSMA        | Abcam                     | ab5694         | rabbit  | 1:200 | 1:200  | 1:200 |        |          |

*Table S1, Related to Figures 1-6 and Figures S1-S4. Antibodies and dilutions used.* Antibodies used were from the following sources: Abcam (Cambridge, MA), BD Biosciences (Franklin Lakes, NJ), Boster Bio (Pleasanton, CA), Cell Signaling Technology (Danvers, MA), Invitrogen (Carlsbad, CA), Novus Biologicals (Centennial, CO), R&D Systems (Minneapolis, MN), Sigma-Aldrich (St. Louis, MO), and STEMCELL Technologies (Vancouver, Canada).
